# Supplementary material for: Does integrated community case management (iCCM) target health inequities and treatment delays? Evidence from an analysis of Demographic and Health Surveys data from 21 countries in the period 2010 to 2018
Source: PubMed Central journal article supplement (PMC7979156; doi:10.7189/jogh.11.04013), 2021-03-01
Supplement: jogh-11-04013-s001.pdf [file jogh-11-04013-s001.pdf]

Online Supplementary Document: Does integrated community case management (iCCM) target health inequities and treatment delays? Evidence from an analysis of Demographic and Health Surveys data from 21 countries in the period 2010 to 2018.

Winsky, P.<sup>1</sup>, Mousa, A.<sup>1</sup>, Oresanya, O.<sup>2</sup>, Counihan, H.<sup>3</sup>, Okell, L.<sup>1</sup>, Walker, P. G.<sup>1</sup>,

1. MRC Centre for Global Infectious Disease Analysis, Imperial College London.
2. Malaria Consortium, Abuja, Nigeria
3. Malaria Consortium, London, UK

## Provider classifications

### *Community Health Worker*

Government community health worker, community health worker, community relay, Public: ASHA, (Private) Village Health Worker, government HSA, Community Health worker ("ADBC"), health cabinet/ CHW, village health worker, role model caregiver/community worker, private fieldworker/CHW, public fieldworker/CHW, Lady h.worker, SISCa post, Fieldworker/Community health worker, private community health worker, public fieldworker/VHT, community health worker (VHT), community health worker/VHT, private fieldworker/VHT, private community based agent/fieldworker, public community based agent/fieldworker, Government community health worker, community health worker, community relay, Public: ASHA, (Private) Village Health Worker, government HSA, Community Health worker ("ADBC"), health cabinet/ CHW, village health worker, Lady h.worker, CS community health worker, Community health worker, SISCa post, Private community health worker, Public fieldworker/VHT, public fieldworker/VHT, community based agent/fieldworker

### *Public*

Government health center, Religious Hospital, Government trained health worker, government hospital, Government "Centre Social", Government family planning clinic, Government field worker, government health center, government health post, health worker, other public sector, public health center, national hospital, district hospital, registered health center, regional hospital, registered hospital, mobile nurse, mobile clinic, Public: Govt./Municipal Hospital, Public: Sub-Centre/ANM, Public: CHC/Rural Hospital/Block PHC, Public: PHC/Additional PHC, Public: UHC/UHP/UFWC, Public: Anganwadi/ICDS Centre, NGO or Trust Hospital/Clinic, Public: Govt. Mobile Clinic, Public: Camp, Public: Vaidya/Hakim/Homeopath (AYUSH), Other Public Health, government health center, mission/ hospital clinic, (Public) Government Health Post, government hospital II, health center II, government hospital I, health center I, CHAM / mission hospital, government health post / outreach, CHAM / mission health center, government mobile clinic, Community Health Center ("CSCOM"), Reference Health Centre ("CSREF"), government regional hospital, government national hospital, Other public sector, community health center, reference health center, government health center (RHC), public traditional medical clinic, public mobile clinic, free mobile clinic, BHU(Basic Health Unit), Rural health centre/Mother child health centre, health center, government reference hospital, District hospital, health post, referral hospital, provincial / district hospital, other public facility, government mobile team, public outreach worker, other public, Community health centre, Referral hospital, Health post, National hospital, Mobile clinic, Government health post, Government hospital, public out reach service, PNFP health center, PNFP hospital, outreach/mobile clinic, government health center/post, public mobile hospital/clinic, Government health center, Religious Hospital, Government family planning clinic, government hospital, Government field worker, Government trained health worker, Government "Centre Social", public health center, registered health center, regional hospital, district hospital, national hospital, other public sector, registered hospital, government health post, government health center, mobile nurse, health worker, mobile clinic, Public: CHC/Rural Hospital/Block PHC, Public: Sub-Centre/ANM, Public: UHC/UHP/UFWC, NGO or Trust Hospital/Clinic, Public: PHC/Additional PHC, Public: Govt./Municipal Hospital, Public: Govt. Mobile Clinic, Public: Vaidya/Hakim/Homeopath (AYUSH), Public: Anganwadi/ICDS Centre, Other Public Health, Public: Camp, government dispensary, mission hospital, (Public) Government Health Post, government health post / outreach, government mobile clinic, Community Health Center ("CSCOM"), Reference Health Centre ("CSREF"), government national hospital, government regional hospital, community health center, reference health center, government health center (RHC), other public center, public mobile clinic, public traditional medical clinic, public fieldworker, Rural health

centre/Mother child health centre, BHU(Basic Health Unit), health center, government reference hospital, health post, other public facility, CS health post, provincial / district hospital, Mobile clinic, public outreach worker, other public, Community health centre, National hospital, Referral hospital, Health post, outreach/mobile clinic, government health center/post, mobile hospital/clinic, mission hospital/clinic

#### *Private*

private pharmacy, Market, Shop, private hospital/clinic, private doctor, Other private medical, private hospital/ clinic, market, private health worker, shop, private health center, other sector market, other sector shop, other medical private, Private: Hospital, Public: Govt. Dispensary, Private: Doctor/Clinic, Other Private Health, Private: Vaidya/Hakim/Homeopath (AYUSH), Private: Paramedic, Private: Pharmacy/Drugstore, government dispensary, other private medical, (Other) Shop, (Private) CHAL Health Center, (Private) Red Cross Health Center, (Private) CHAL Hospital, (Private) CHAL Health Post, kiosk, private HSA, private mobile clinic, Other private medical sector, Itinerant drug seller, dispensary/maternity clinic, Street vendor, pharmacy, dispensary maternity, street drug vendor, other private, other private sector, chemist/PMV, chemist/PMS, itinerant drug seller, other private medical sector, private pharmacy (chemist/medical store), private polyclinic, dispensary, private doctor/clinic, Kiosk, kiosk / shop, private comm. health worker, private outreach worker, Dispensary, Other private sector, private out reach service, private pharmacy/drug shop, hawker/itinerant drug seller, private mission hospital/clinic, private mobile hospital/clinic, Market, Shop, private pharmacy, private doctor, private hospital/clinic, private health center, other source itinerant drug seller, other source shop, shop, market, other medical private, Private: Hospital, Private: Doctor/Clinic, Other Private Health, Private: Pharmacy/Drugstore, Private: Paramedic, Public: Govt. Dispensary, Private: Vaidya/Hakim/Homeopath (AYUSH), other private, (Private) CHAL Health Center, (Private) CHAL Health Post, (Private) CHAL Hospital, private CHAM / mission health center, private CHAM / mission hospital, private mobile clinic, other private medical, private HSA, Street vendor, pharmacy, dispensary/maternity clinic, Dispensary/ maternity, street drug vendor, chemist/PMS, private fieldworker, itinerant drug seller, other private medical sector, private pharmacy (chemist/medical store), dispensary, private doctor/clinic, kiosk / shop, other private medical facility, private comm. health worker, private outreach worker, Other private medical sector, private pharmacy/drug shop, other private sector

#### *Traditional*

Traditional Practitioner, traditional pract, other source traditional practitioner, traditional pract., Traditional Healer, traditional practitioner, (Other) Traditional Healer, traditional healer, Traditional practitioner, traditinal practitioner, Traditional Practitioner, other source traditional practitioner, traditional pract., Traditional Healer, traditional practitioner, (Other) Traditional Healer, Traditional practitioner, traditional healer, traditional practioner

#### *Other*

Friends, relatives (CS other sector), Other, NGO Field Worker, other, maternity clinic, Friend/Relative, relative/ friend, Health Facility Outside Lesotho, friend/family, BLM, Youth drop in centre, Community health clinic ("Salle de soin"), medical care office, Dumba Nengue, NGO - Myanmar Medical Association (MMA), other NGO sector, NGO - Myanmar Red Cross, UHC/MCH center, drug hawker, other pricate sector, community-oriented resource person, Dispenser/compounder, Homeopath, Hakim, DAI/TBA, friend/relative, outreach, church, clinic, Friend / relative, polyclinic, friend / relative, Other, Family Planning Association of Benin (ABPF), Friend/Relative, relative/friend, Household has a lamp/torch, Household has a bed with a mattress, BLM, Household has a paraffin lamp, Household has a Koloboyi, YOUTH DROP CENTER, How often

members of household went to bed hungry, other, How often spent day/night hungry, medical care office, Dumba Nengue, other NGO sector, NGO - PSI/M (SUN), UHC/MCH center, NGO - Myanmar Red Cross, community-oriented resource person, Dispenser/compounder, Homeopath, Community midwife, Hakim, DAI, TBA, friend/relative, outreach, friend / relative, polyclinic

Figures and tables

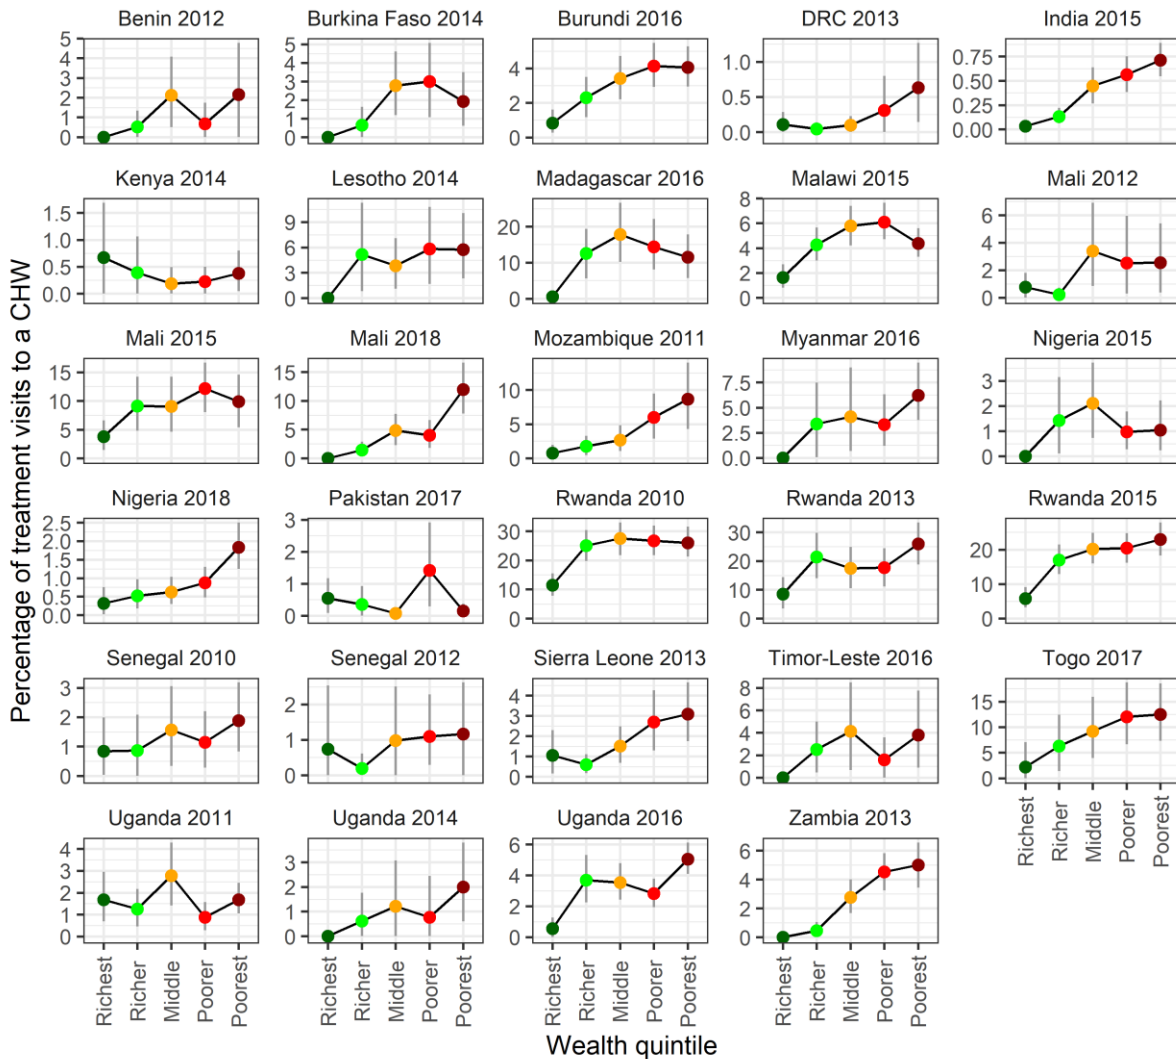

**Figure S1. The percentage of treatment visits with a Community Health worker (CHW) as a function of demographic and health survey wealth quintile for all years analysed.** There is an increasing trend in the percentage of treatment visits with a CHW as poverty increases. Values are survey-weighted mean estimates with 95% weighted-bootstrapped confidence intervals.

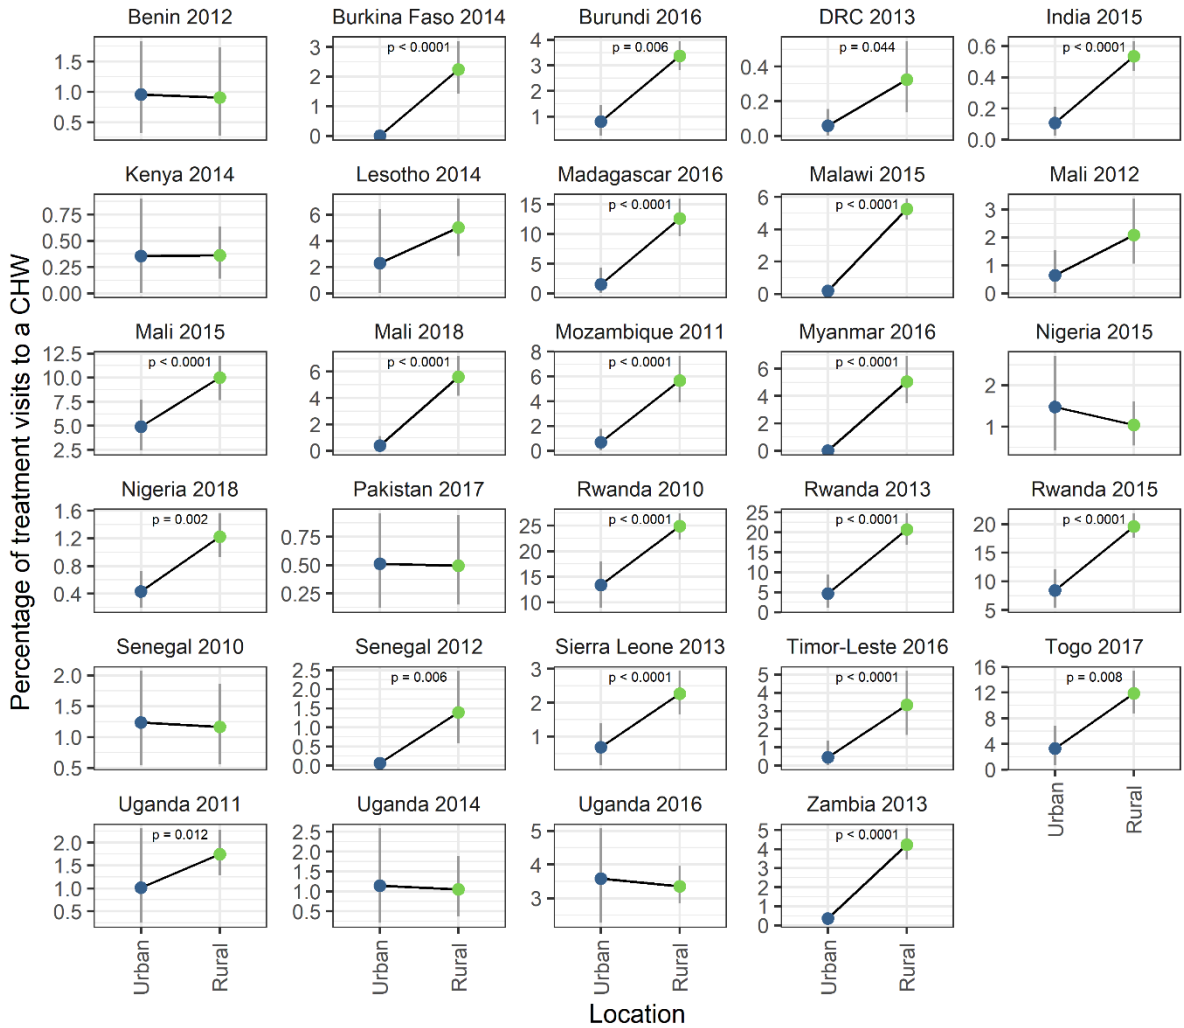

**Figure S2. The percentage of treatment visits to a Community Health Worker (CHW) as a function of urban or rural location for all years analysed.** Visits to CHWs constitute a higher percentage of treatment visits in rural locations compared to urban locations. Values are survey-weighted mean estimates with 95% weighted-bootstrapped confidence intervals. P-values indicate significantly different mean proportions between groups as determined by bootstrapped hypothesis test.

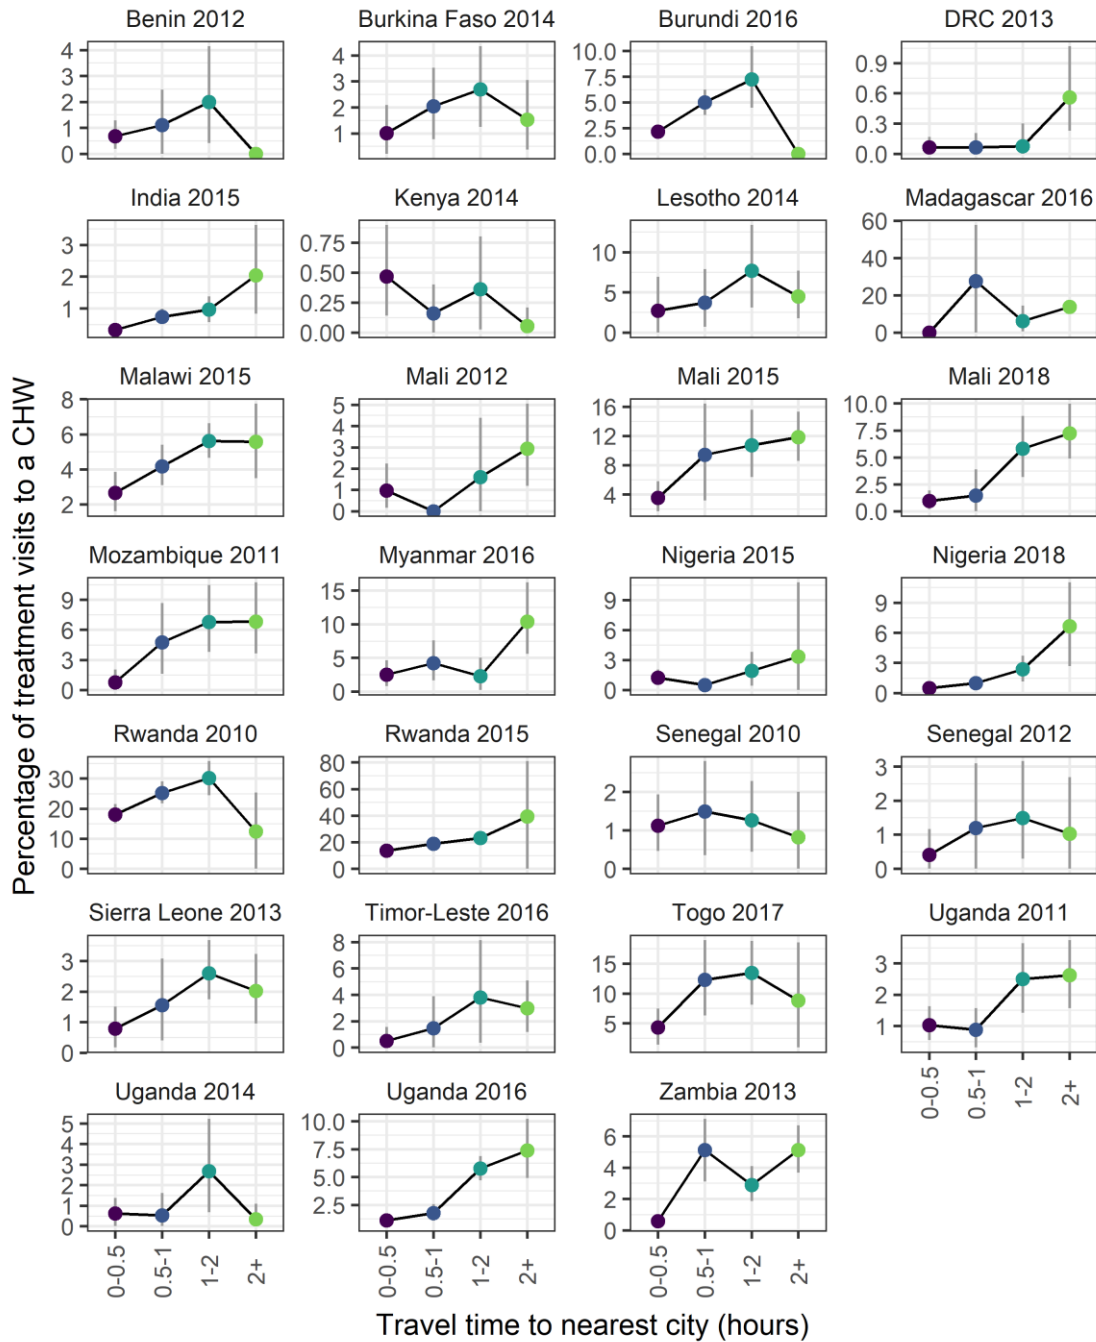

**Figure S3. The percentage of treatment visits to a Community Health worker (CHW) as a function of remoteness (travel time to the nearest city) for all years analysed.** Values are survey-weighted mean estimates with 95% weighted-bootstrapped confidence intervals. For a number of countries there is an increasing trend in the percentage of treatment visits with a CHW as remoteness increases. P-values indicate significantly different mean proportions between groups as determined by bootstrapped hypothesis test.

**Table S1. The percentage of treatment visits assigned to each healthcare provider group for each demographic and health survey.** Only clusters where Community Health Worker activity was identified were included. Values are survey-weighted percentages with 95% weighted-bootstrapped confidence intervals.

| Country      | Year | N    | Percentage of visits from each provider (95% CI) |                   |                   |                   |                  |
|--------------|------|------|--------------------------------------------------|-------------------|-------------------|-------------------|------------------|
|              |      |      | CHW                                              | Public            | Private           | Traditional       | Other            |
| Benin        | 2012 | 49   | 31.2 (17.6, 45.3)                                | 41.4 (27.5, 56.8) | 18.6 (8.7, 29.3)  | 8.8 (2, 16.9)     | 0 (-, -)         |
| Burkina Faso | 2014 | 183  | 15.3 (9.9, 20.7)                                 | 71.8 (65.1, 78.4) | 7.6 (3.8, 11.8)   | 4.7 (1.8, 8.1)    | 0.6 (0, 1.8)     |
| Burundi      | 2016 | 709  | 18.7 (15.9, 21.6)                                | 74.3 (70.9, 77.8) | 6 (4.3, 7.9)      | 0.6 (0, 1.4)      | 0.4 (0, 1)       |
| DRC          | 2013 | 178  | 10.3 (4.8, 16.9)                                 | 53.1 (43.3, 63.3) | 27.9 (18.9, 37.5) | 7.5 (2.7, 12.7)   | 1.2 (0, 3.9)     |
| India        | 2015 | 761  | 30.6 (26.4, 35)                                  | 26.8 (22.8, 31)   | 39.7 (34.9, 44.1) | 0.8 (0, 1.8)      | 2.2 (1.1, 3.6)   |
| Kenya        | 2014 | 67   | 28.5 (14.6, 43.6)                                | 27.7 (14.8, 42.4) | 36.6 (22.8, 51.7) | 0 (-, -)          | 7.2 (0, 15.5)    |
| Lesotho      | 2014 | 70   | 36.2 (23.7, 51.1)                                | 44.5 (29.1, 58.4) | 17.7 (8.6, 28.1)  | 0 (-, -)          | 1.7 (0, 4.3)     |
| Madagascar   | 2016 | 163  | 44.8 (35.5, 54)                                  | 42.5 (33.3, 52)   | 7.9 (3, 13.8)     | 1.6 (0.1, 3.7)    | 3.2 (0, 8.5)     |
| Malawi       | 2015 | 1325 | 20.3 (17.9, 22.8)                                | 63.1 (60.2, 66)   | 12.8 (10.7, 14.9) | 0 (0, 0.1)        | 3.8 (2.6, 5)     |
| Mali         | 2012 | 55   | 42.4 (24.5, 58.3)                                | 27.3 (12.6, 43.3) | 21.1 (9.7, 33.8)  | 3.7 (0, 8.9)      | 5.5 (0, 15)      |
| Mali         | 2015 | 490  | 21.1 (17.1, 25.4)                                | 42.5 (37, 47.3)   | 20.1 (16, 24.3)   | 15.1 (11.8, 18.8) | 1.3 (0.4, 2.4)   |
| Mali         | 2018 | 257  | 24.3 (18.9, 30.4)                                | 19.5 (14.4, 25)   | 46.1 (39, 53.2)   | 7.3 (3.7, 11.3)   | 2.8 (0.8, 5.3)   |
| Mozambique   | 2011 | 121  | 37.9 (26.7, 49.1)                                | 54.2 (42.6, 66)   | 1.1 (0, 3.6)      | 0.7 (0, 2.4)      | 6.1 (1.5, 12.5)  |
| Myanmar      | 2016 | 141  | 36.4 (26, 47.3)                                  | 26.4 (18.1, 35.7) | 27.5 (17.2, 38.3) | 1.4 (0, 3.8)      | 8.2 (2.5, 15.1)  |
| Nigeria      | 2015 | 99   | 22.1 (14.4, 31.3)                                | 23.6 (14.7, 33)   | 51.6 (41.5, 61.7) | 0.8 (0, 2.1)      | 1.9 (0, 7.1)     |
| Nigeria      | 2018 | 713  | 12.5 (9.4, 15.6)                                 | 36.1 (32.2, 40.1) | 49.8 (45.7, 54)   | 1 (0.2, 2)        | 0.6 (0.2, 1)     |
| Pakistan     | 2017 | 168  | 11.1 (5.7, 18.1)                                 | 15.4 (9.3, 22.7)  | 67.5 (58.3, 76.4) | 0 (-, -)          | 5.9 (1.7, 11)    |
| Rwanda       | 2010 | 849  | 41.7 (38.3, 45.3)                                | 36.9 (33.6, 40.4) | 7 (5.2, 9)        | 2.7 (1.6, 4.1)    | 11.7 (9.5, 14.1) |
| Rwanda       | 2013 | 307  | 36 (30.4, 42)                                    | 45.4 (39, 50.9)   | 7.4 (4.7, 10.7)   | 2.9 (1.2, 4.9)    | 8.4 (5.4, 11.6)  |
| Rwanda       | 2015 | 777  | 40.3 (36.5, 44)                                  | 45.2 (41.6, 49)   | 10.2 (7.8, 12.5)  | 1 (0.3, 1.7)      | 3.4 (2.2, 4.7)   |
| Senegal      | 2010 | 258  | 12.7 (8.1, 18.4)                                 | 68.5 (61.3, 75.2) | 16 (10.1, 22.7)   | 1.4 (0.2, 3.3)    | 1.3 (0.3, 2.6)   |
| Senegal      | 2012 | 109  | 13.9 (6.8, 22.9)                                 | 65.9 (54.5, 77)   | 15.8 (6.9, 25.7)  | 4 (0, 9.2)        | 0.5 (0, 1.6)     |
| Sierra Leone | 2013 | 385  | 17.1 (12.5, 21.6)                                | 73 (67.8, 78.1)   | 5.2 (3, 7.9)      | 2.5 (1, 4.1)      | 2.2 (0.7, 3.9)   |
| Timor-Leste  | 2016 | 48   | 43 (24.9, 61.7)                                  | 51.6 (34, 68.8)   | 3.6 (0, 11.5)     | 1.8 (0, 6.4)      | 0 (-, -)         |
| Togo         | 2017 | 175  | 27.2 (20.4, 34.4)                                | 12.8 (7.3, 18.7)  | 53.1 (45.6, 60.3) | 3.8 (1.4, 6.5)    | 3.1 (0.8, 5.9)   |
| Uganda       | 2011 | 600  | 13.4 (10.3, 17)                                  | 32 (27.5, 36.4)   | 51.6 (46.4, 56.3) | 0.1 (0, 0.2)      | 2.9 (1, 5.3)     |
| Uganda       | 2014 | 90   | 16.2 (7.7, 26.1)                                 | 32.2 (21, 43.7)   | 50.3 (37.7, 62.3) | 1.3 (0, 4)        | 0 (-, -)         |
| Uganda       | 2016 | 1189 | 20 (17.3, 22.9)                                  | 40.1 (36.7, 43.7) | 39.1 (35.6, 42.8) | 0.5 (0.1, 1.1)    | 0.3 (0, 0.6)     |
| Zambia       | 2013 | 379  | 28.2 (23.5, 33)                                  | 60.6 (55.5, 65.8) | 7.1 (4.1, 10.4)   | 2.5 (0.8, 4.5)    | 1.6 (0.3, 3.3)   |



**Table S2. The country-level percentage of treatment visits assigned to each healthcare provider group for each demographic and health survey.** Values are survey-weighted percentages with 95% weighted-bootstrapped confidence intervals. In a number of countries Community Health Workers constitute a very low proportion of total treatments provided.

| Country      | Year | N      | CHW               | Public            | Private           | Traditional       | Other            |
|--------------|------|--------|-------------------|-------------------|-------------------|-------------------|------------------|
| Benin        | 2012 | 1363   | 0.9 (0.5, 1.5)    | 52.2 (49.4, 55.4) | 35.7 (32.7, 38.3) | 6.5 (5.2, 7.9)    | 4.5 (3.2, 6)     |
| Burkina Faso | 2014 | 1693   | 1.8 (1.1, 2.5)    | 87.9 (86.2, 89.7) | 6.4 (5, 7.7)      | 2.5 (1.7, 3.3)    | 1.4 (0.7, 2.2)   |
| Burundi      | 2016 | 4241   | 3.2 (2.7, 3.7)    | 85.4 (84.3, 86.6) | 10.3 (9.4, 11.3)  | 0.5 (0.3, 0.8)    | 0.6 (0.4, 0.9)   |
| DRC          | 2013 | 5784   | 0.2 (0.1, 0.4)    | 54.4 (52.5, 56.1) | 38.6 (36.8, 40.4) | 4.3 (3.6, 5.1)    | 2.5 (1.9, 3.1)   |
| India        | 2015 | 45148  | 0.4 (0.3, 0.5)    | 23 (22.5, 23.6)   | 72.3 (71.7, 72.9) | 0.5 (0.4, 0.6)    | 3.8 (3.6, 4)     |
| Kenya        | 2014 | 6660   | 0.4 (0.2, 0.6)    | 42.5 (40.9, 44.1) | 56 (54.3, 57.5)   | 0.4 (0.3, 0.7)    | 0.8 (0.5, 1.1)   |
| Lesotho      | 2014 | 681    | 4.3 (2.6, 6.2)    | 58.2 (53.9, 63)   | 33.7 (29.5, 38.1) | 1.2 (0.4, 2.1)    | 2.7 (1.4, 4.2)   |
| Madagascar   | 2016 | 639    | 11.5 (8.7, 14.5)  | 59.7 (54.6, 64.1) | 21.5 (17.4, 25.6) | 1.6 (0.7, 2.7)    | 5.8 (3.6, 8.3)   |
| Malawi       | 2015 | 5630   | 4.6 (4, 5.2)      | 74.4 (72.9, 75.8) | 14.9 (13.6, 16.2) | 0.2 (0.1, 0.4)    | 5.8 (5, 6.5)     |
| Mali         | 2012 | 1020   | 1.7 (0.9, 2.6)    | 45.2 (41.1, 48.9) | 33 (29.7, 36.5)   | 14.4 (11.7, 17.2) | 5.8 (3.9, 7.7)   |
| Mali         | 2015 | 1198   | 8.8 (6.9, 10.8)   | 50.6 (47.3, 54)   | 25.4 (22.7, 28.4) | 13.8 (11.6, 16)   | 1.3 (0.7, 2)     |
| Mali         | 2018 | 1613   | 4.4 (3.3, 5.6)    | 33 (30.5, 35.6)   | 49.7 (46.9, 52.5) | 8.9 (7.3, 10.4)   | 4 (3, 5)         |
| Mozambique   | 2011 | 1523   | 4 (2.7, 5.2)      | 89.4 (87.4, 91.4) | 1.5 (0.9, 2.2)    | 2.6 (1.6, 3.8)    | 2.5 (1.6, 3.5)   |
| Myanmar      | 2016 | 1176   | 3.8 (2.5, 5.4)    | 53.4 (49.7, 57.2) | 38.1 (34.4, 42)   | 1.3 (0.5, 2.3)    | 3.4 (2.1, 4.7)   |
| Nigeria      | 2015 | 1752   | 1.2 (0.7, 1.7)    | 29.3 (26.9, 31.7) | 66.6 (64.2, 69.1) | 1.8 (1.2, 2.5)    | 1.2 (0.7, 1.7)   |
| Nigeria      | 2018 | 8120   | 1 (0.8, 1.2)      | 35.1 (33.9, 36.3) | 60.8 (59.5, 62)   | 1.8 (1.5, 2.1)    | 1.3 (1, 1.6)     |
| Pakistan     | 2017 | 5214   | 0.5 (0.2, 0.8)    | 17.1 (15.6, 18.6) | 72.8 (71, 74.6)   | 0 (-, -)          | 9.6 (8.4, 10.8)  |
| Rwanda       | 2010 | 1604   | 23.1 (20.8, 25.2) | 50.6 (47.8, 53.2) | 11.7 (10.1, 13.4) | 3.8 (2.8, 4.8)    | 10.9 (9.2, 12.5) |
| Rwanda       | 2013 | 622    | 18.3 (15.4, 21.2) | 53.4 (49.4, 57.4) | 13 (10.1, 15.8)   | 3.3 (1.9, 4.9)    | 12 (9.6, 14.9)   |
| Rwanda       | 2015 | 1801   | 17.5 (15.6, 19.3) | 58.8 (56.3, 61)   | 15.4 (13.7, 17.3) | 2.6 (1.8, 3.4)    | 5.8 (4.7, 7)     |
| Senegal      | 2010 | 2606   | 1.2 (0.8, 1.7)    | 69.6 (66.9, 72.2) | 20.8 (18.4, 23.1) | 4 (3.1, 4.9)      | 4.5 (3.3, 5.9)   |
| Senegal      | 2012 | 1206   | 0.8 (0.4, 1.3)    | 71.8 (68.1, 75.6) | 23 (19.3, 26.5)   | 3.2 (2.1, 4.6)    | 1.2 (0.6, 1.9)   |
| Sierra Leone | 2013 | 3337   | 1.8 (1.3, 2.4)    | 83.7 (82.1, 85.2) | 11.3 (10, 12.6)   | 1 (0.7, 1.4)      | 2.2 (1.6, 2.8)   |
| Timor-Leste  | 2016 | 1055   | 2.1 (1.1, 3.2)    | 87.8 (85.1, 90.4) | 8.9 (6.6, 11.2)   | 0.7 (0.2, 1.3)    | 0.5 (0, 1.2)     |
| Togo         | 2017 | 461    | 9 (6.6, 11.5)     | 22.4 (17.8, 27.2) | 63.9 (58.5, 68.9) | 2.2 (1, 3.6)      | 2.5 (1.3, 4.1)   |
| Uganda       | 2011 | 4530   | 1.6 (1.2, 2.1)    | 37.1 (35.5, 38.8) | 59 (57.3, 60.5)   | 1 (0.5, 1.5)      | 1.3 (0.9, 1.7)   |
| Uganda       | 2014 | 1126   | 1.1 (0.4, 1.8)    | 45.5 (42.2, 48.7) | 52.9 (49.6, 56.5) | 0.2 (0, 0.4)      | 0.3 (0.1, 0.7)   |
| Uganda       | 2016 | 5783   | 3.4 (2.9, 3.9)    | 40.7 (39.2, 42.1) | 54.6 (53.1, 56.2) | 0.7 (0.5, 1)      | 0.6 (0.4, 0.8)   |
| Zambia       | 2013 | 3896   | 2.9 (2.3, 3.5)    | 87 (85.8, 88.2)   | 8.6 (7.6, 9.7)    | 0.8 (0.5, 1.1)    | 0.7 (0.4, 1)     |
| Total        | NA   | 121482 | 2.1 (2, 2.2)      | 42.6 (42.3, 43)   | 50.6 (50.2, 50.9) | 1.5 (1.4, 1.6)    | 3.2 (3.1, 3.3)   |



**Table S3. Treatment seeking delays.** The percentage (95% bootstrapped confidence intervals) of treatment seeking visits for fever to each type of provider (Community Health Worker (CHW), public and private providers) that occur within a given timeframes.

| Country     | Year | 0-24 hours           |                      |                      | 24-48 hours           |                      |                      |
|-------------|------|----------------------|----------------------|----------------------|-----------------------|----------------------|----------------------|
|             |      | CHW                  | Public               | Private              | CHW                   | Public               | Private              |
| Burundi     | 2016 | 51.5% (43.4%, 59.7%) | 33.1% (31.1%, 34.8%) | 35.5% (29.8%, 40.8%) | 33.5% (25.6%, 41.5%)  | 40.3% (38.5%, 42.3%) | 35.8% (29.9%, 41.5%) |
| India       | 2015 | 31.0% (20.1%, 41.4%) | 25.2% (23.9%, 26.7%) | 29.6% (28.8%, 30.5%) | 45.0% (34.2%, 56.2%)  | 40.1% (38.4%, 41.8%) | 41.3% (40.3%, 42.2%) |
| Kenya       | 2014 | 17.0% (0.0%, 53.9%)  | 10.8% (8.2%, 13.7%)  | 11.1% (9.1%, 13.2%)  | 73.0% (33.0%, 100.0%) | 34.3% (30.4%, 38.3%) | 34.4% (31.7%, 37.6%) |
| Madagascar  | 2016 | 19.7% (8.7%, 31.0%)  | 19.4% (13.6%, 25.7%) | 30.0% (21.2%, 40.9%) | 28.3% (17.3%, 41.6%)  | 30.4% (24.4%, 36.5%) | 36.3% (25.9%, 46.4%) |
| Malawi      | 2015 | 29.8% (22.4%, 37.4%) | 23.4% (21.6%, 25.1%) | 35.9% (31.0%, 41.6%) | 40.7% (32.6%, 48.8%)  | 43.8% (41.6%, 46.1%) | 34.8% (29.5%, 40.3%) |
| Mali        | 2018 | 21.8% (9.1%, 34.7%)  | 24.6% (19.4%, 29.9%) | 28.8% (24.2%, 33.4%) | 33.7% (18.7%, 48.9%)  | 21.8% (17.3%, 26.4%) | 26.0% (21.6%, 30.6%) |
| Nigeria     | 2015 | 16.3% (3.5%, 34.6%)  | 34.1% (29.2%, 38.6%) | 36.3% (33.4%, 39.4%) | 10.5% (0.0%, 24.9%)   | 18.3% (14.4%, 22.0%) | 20.3% (17.5%, 22.9%) |
| Nigeria     | 2018 | 14.5% (7.2%, 23.5%)  | 14.5% (12.8%, 16.3%) | 23.1% (21.4%, 24.8%) | 34.5% (24.1%, 46.4%)  | 32.2% (29.9%, 34.5%) | 31.4% (29.6%, 33.1%) |
| Pakistan    | 2017 | 69.4% (35.3%, 91.4%) | 19.2% (15.1%, 23.8%) | 30.6% (28.0%, 33.1%) | 15.9% (0.0%, 41.2%)   | 35.8% (30.7%, 41.4%) | 38.6% (35.8%, 41.3%) |
| Timor-Leste | 2016 | 34.7% (0.0%, 64.3%)  | 19.1% (15.4%, 23.1%) | 14.4% (4.9%, 27.4%)  | 21.3% (0.0%, 50.8%)   | 30.4% (25.6%, 35.3%) | 29.1% (13.8%, 44.3%) |
| Togo        | 2017 | 36.9% (23.7%, 51.9%) | 13.8% (6.3%, 22.0%)  | 31.7% (25.9%, 37.8%) | 38.2% (24.5%, 52.2%)  | 49.6% (37.5%, 61.6%) | 39.2% (32.6%, 45.4%) |
| Uganda      | 2016 | 33.5% (25.9%, 41.2%) | 26.8% (24.7%, 29.0%) | 31.4% (29.2%, 33.7%) | 29.3% (21.4%, 37.2%)  | 29.9% (27.8%, 32.1%) | 26.4% (24.4%, 28.4%) |
| Zambia      | 2013 | 12.3% (6.1%, 19.7%)  | 8.3% (7.1%, 9.6%)    | 17.5% (12.4%, 22.6%) | 34.7% (24.7%, 45.6%)  | 40.0% (37.8%, 42.3%) | 32.1% (25.9%, 39.0%) |
| Total       | -    | 30.2% (26.7%, 33.3%) | 22.7% (22.0%, 23.4%) | 28.6% (27.9%, 29.3%) | 34.9% (31.5%, 38.3%)  | 37.6% (36.8%, 38.4%) | 37.7% (37.0%, 38.3%) |

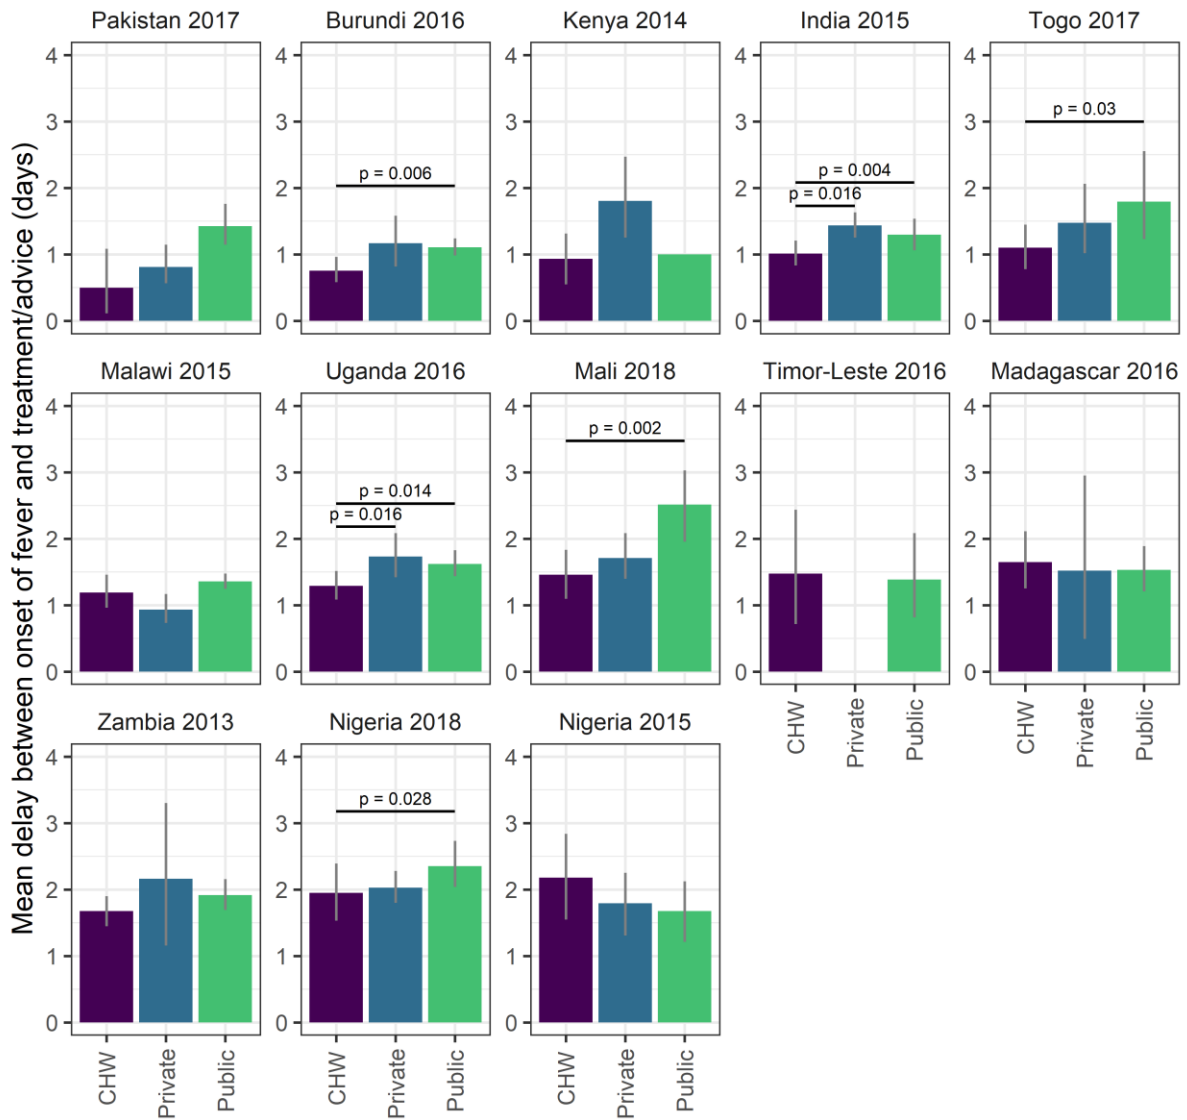

**Figure S4. The average delay before treatment (days after fever began that advice or treatment was sought) by treatment provider group with data subset to consider only those clusters where Community Health Worker (CHW) activity was recorded.** Values are survey-weighted mean estimates with 95% weighted-bootstrapped confidence intervals. Horizontal lines and p-values indicates significantly different mean times between groups as determined by bootstrapped hypothesis test. Surveys are ordered by descending average treatment delays for CHWs.
